# Supplementary material for: Attribution of global evapotranspiration trends based on the Budyko framework
Source: Copernicus journal article supplement (doi:10.5194/hess-26-3691-2022), 2022-07-15
Supplement: Supplementary file 1 [file hess-26-3691-2022-supplement.pdf]

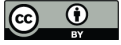

*Supplement of*

## **Attribution of global evapotranspiration trends based on the Budyko framework**

**Shijie Li et al.**

*Correspondence to:* Guojie Wang (gwang@nuist.edu.cn)

The copyright of individual parts of the supplement might differ from the article licence.

Table S1. Comparisons of landcover types data used by the four ET products

| ET product                  | Landcover types data               | Period |
|-----------------------------|------------------------------------|--------|
| GLEAM3.0a                   | MOD44B                             | Static |
| GLDAS2.0-Noah               | MCD12Q1                            | Static |
| MERRA-Land                  | Global Land Cover Characterization | Static |
| W3RA                        | MOD44B                             | Static |
| HTESSEL-CaMa                |                                    | Static |
| JULES                       | Global Land Cover Characterization | Static |
| Earth2Observe-En PCR-GLOBWB |                                    | Static |
| LISFLOOD                    |                                    | Static |
| HBV-SIMREG                  | GlobCover2009                      | Static |
| WaterGAP3                   | MOD12Q1                            | Static |

Note: However, regarding Earth2Observe-En, the LUC datasets used by seven (in this table) and two models (i.e., ORCHIDEE and SURFEX-TRIP) are available and unavailable, respectively; the LUC is not the necessary input for SWBM.

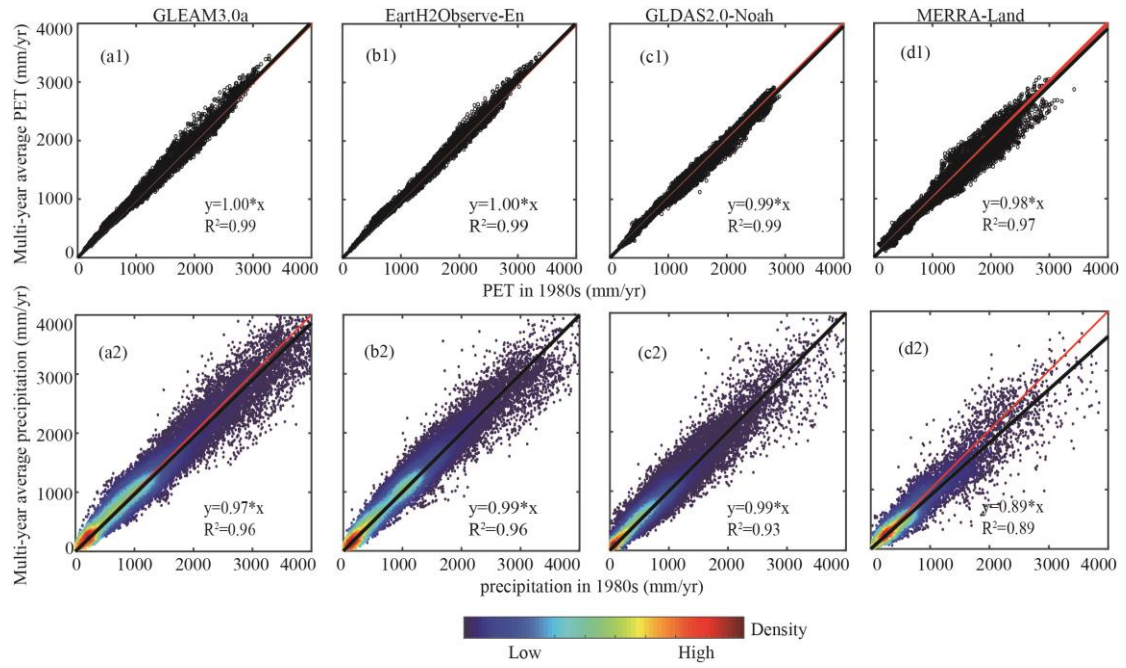

Figure S1. The pixel-wise scatterplots of PET in 1980s against multi-year average PET for GLEAM3.0a (a1), Earth2Observe-En (b1), GLDAS2.0-Noah (c1), and MERRA-Land (d1) and precipitation in 1980s against multi-year average precipitation for GLEAM3.0a (a2), Earth2Observe-En (b2), GLDAS2.0-Noah (c2), and MERRA-Land (d2).

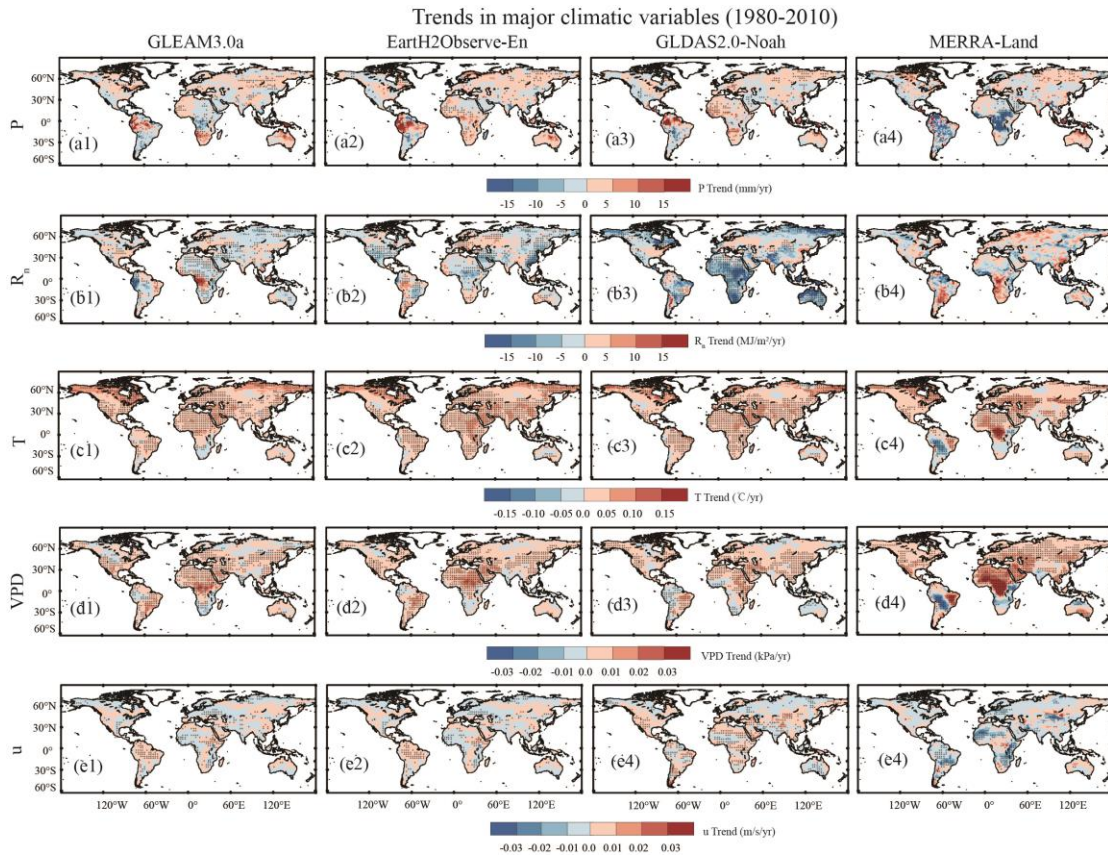

Figure S2. Spatial distribution of annual linear trend in each driving factor during 1980-2010. Small letters (a-e) respectively indicate P,  $R_n$ , T, VPD, and u and numbers (1-4) represent GLEAM3.0a, Earth2Observe-En, GLDAS2.0-Noah, and MERRA-Land. Dotted area indicates the trend passes significance level ( $p < 0.05$ ).

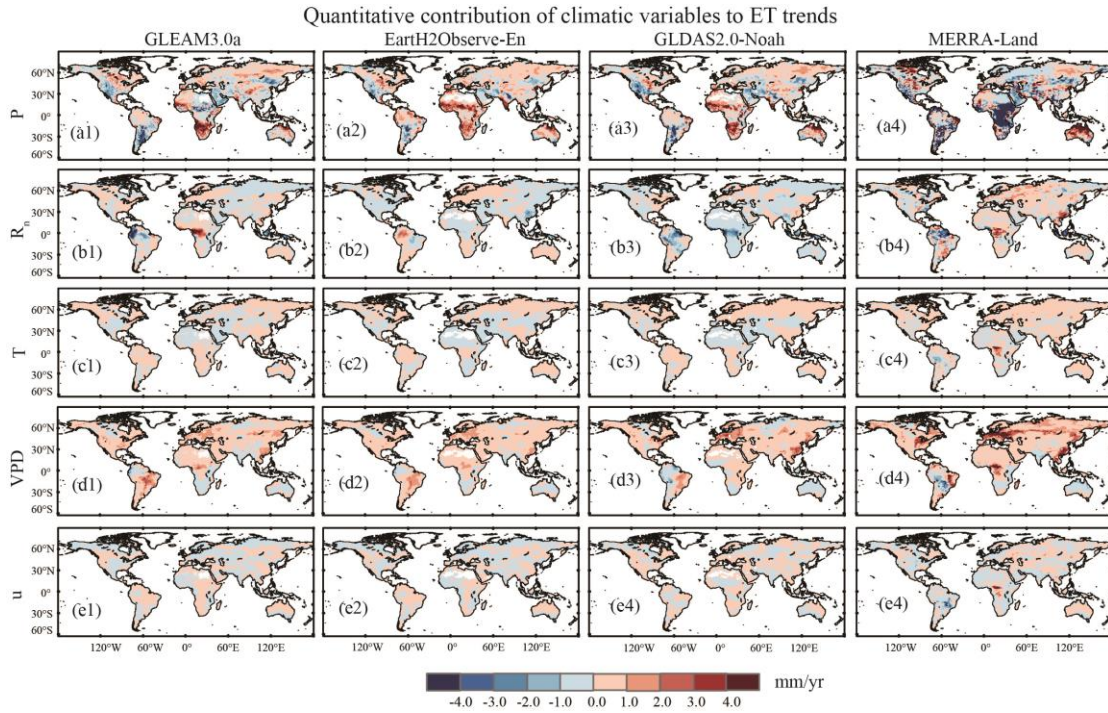

Figure S3. Attributions of the global long-term annual ET linear trend during 1980-2010. Small letters (a-e) indicate P,  $R_n$ , T, VPD and u respectively; and numbers (1-4) indicate the ET products of GLEAM3.0a, Earth2Observe-En, GLDAS2.0-Noah and MERRA-Land respectively.

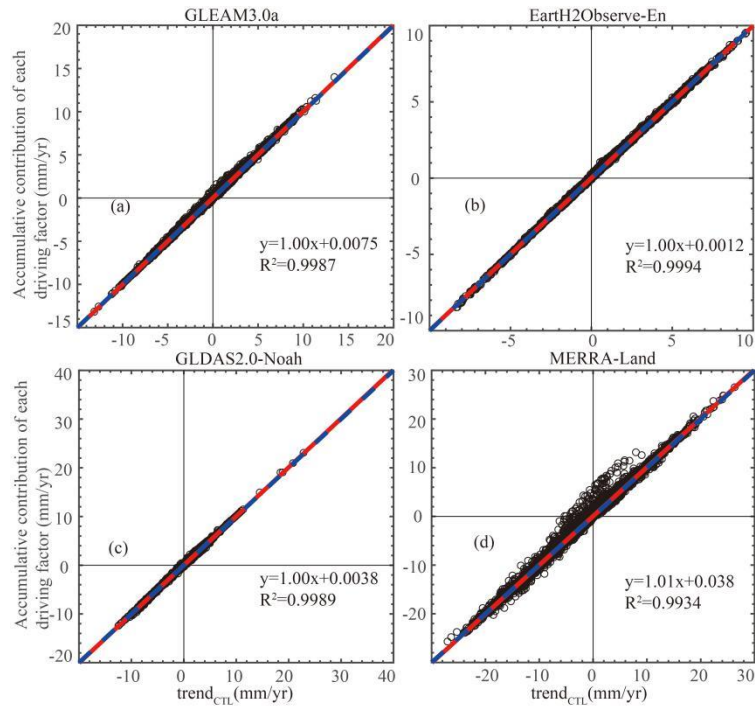

Figure S4. The pixel-wise scatterplots of the accumulative contributions of five selected driving factors against the control trend ( $\text{trend}_{\text{CTL}}$ ) in ET for GLEAM3.0a (a), Earth2Observe-En (b), GLDAS2.0-Noah (c), and MERRA-Land (d). The red line indicates a fitted line of the scatter points along with the 1:1 blue dotted line.



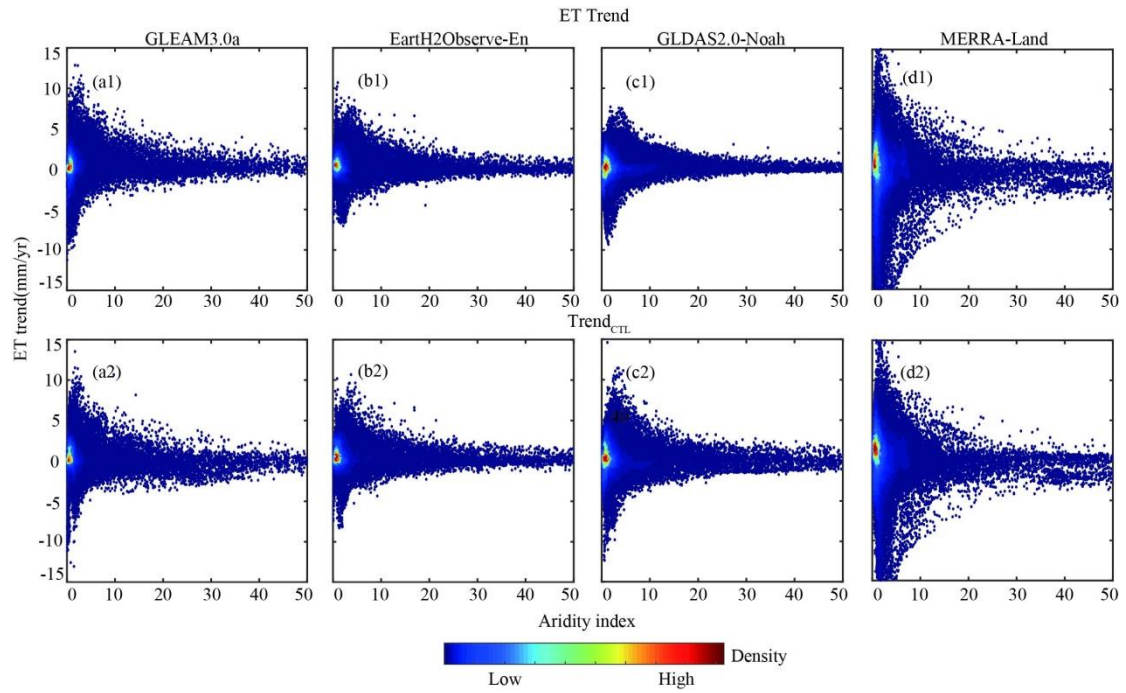

Figure S5. The pixel-wise scatterplots of multi-year average aridity index against actual ET annual values for GLEAM3.0a (a1), Earth2Observe-En (b1), GLDAS2.0-Noah (c1), and MERRA-Land (d1), the control ET trend (trend<sub>CTL</sub>) for GLEAM3.0a (a2), Earth2Observe-En (b2), GLDAS2.0-Noah (c2), and MERRA-Land (d2). Aridity index (PET/precipitation) in each product is calculated with respective precipitation and PET data.
